## RESEARCH ARTICLE

# Predicting postpartum hemorrhage in women undergoing planned cesarean section: A multicenter retrospective cohort study in Japan

Tomoko Yamaguchi<sup>1</sup>, Hyo Kyozyuka<sup>1\*</sup>, Momoka Ito<sup>1</sup>, Tsuyoshi Hiraiwa<sup>2</sup>, Tsuyoshi Murata<sup>3</sup>, Misa Sugeno<sup>2</sup>, Fumihiro Ito<sup>1</sup>, Daisuke Suzuki<sup>1</sup>, Toma Fukuda<sup>4</sup>, Shun Yasuda<sup>4</sup>, Fujimori Keiya<sup>4</sup>, Yasuhisa Nomura<sup>1</sup>

**1** Department of Obstetrics and Gynecology, Ohta Nishinouchi Hospital, Koriyama city, Fukushima, Japan, **2** Department of Obstetrics and Gynecology, Iwase General Hospital, Sukagawa city, Fukushima, Japan, **3** Department of Obstetrics and Gynecology, Shirakawa Kosei General Hospital, Shirakawa, Fukushima, Japan, **4** Department of Obstetrics and Gynecology, Fukushima Medical University School of Medicine, Fukushima, Japan

\* [kyozuka@fmu.ac.jp](mailto:kyozuka@fmu.ac.jp)

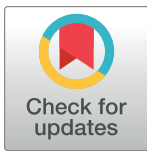

## OPEN ACCESS

**Citation:** Yamaguchi T, Kyozyuka H, Ito M, Hiraiwa T, Murata T, Sugeno M, et al. (2024) Predicting postpartum hemorrhage in women undergoing planned cesarean section: A multicenter retrospective cohort study in Japan. *PLoS ONE* 19(7): e0306488. <https://doi.org/10.1371/journal.pone.0306488>

**Editor:** Gulzhanat Aimagambetova, Nazarbayev University School of Medicine, KAZAKHSTAN

**Received:** July 20, 2023

**Accepted:** June 18, 2024

**Published:** July 9, 2024

**Copyright:** © 2024 Yamaguchi et al. This is an open access article distributed under the terms of the [Creative Commons Attribution License](https://creativecommons.org/licenses/by/4.0/), which permits unrestricted use, distribution, and reproduction in any medium, provided the original author and source are credited.

**Data Availability Statement:** All relevant data are within the paper and its [Supporting Information](#) files.

**Funding:** This research was partially supported by the Ministry of Education, Science, Sports and Culture, Grant-in-Aid for Scientific research, 2021–2023 (grant number: 21K09473). The funder had no role in study design, data collection and analysis, decision to publish, or preparation of the manuscript.

## Abstract

Given Japan's unique social background, it is critical to understand the current risk factors for postpartum hemorrhage (PPH) to effectively manage the condition, especially among specific groups. Therefore, this study aimed to identify the current risk factors for PPH during planned cesarean section (CS) in Japan. This multicenter retrospective cohort study was conducted in two tertiary maternal-fetal medicine units in Fukushima, Japan and included 1,069 women who underwent planned CS between January 1, 2013, and December 31, 2022. Risk factors for PPH (of > 1000 g and > 1500 g) were assessed using multivariate logistic regression analysis, considering variables such as maternal age, parity, assisted reproductive technology (ART) pregnancy, pre-pregnancy body mass index (BMI), uterine myoma, placenta previa, gestational age at delivery, birth weight categories, and hypertensive disorders of pregnancy (HDP). Multivariate linear regression analyses were conducted to predict estimated blood loss during planned CS. ART pregnancy, a pre-pregnancy BMI of 25.0–29.9 kg/m<sup>2</sup>, and uterine myoma increased PPH risk at various levels. Maternal smoking increased the risk of >1500 g PPH (adjusted odds ratio: 3.09, 95% confidence interval [CI]: 1.16–8.20). Multivariate linear analysis showed that advanced maternal age (B: 83 g; 95% CI: 27–139 g), ART pregnancy (B: 239 g; 95% CI: 121–357 g), pre-pregnancy BMI of 25.0–29.9 kg/m<sup>2</sup> (B: 74 g; 95% CI: 22–167 g), uterine myoma (B: 151 g; 95% CI: 47–256 g), smoking (B: 107 g; 95% CI: 13–200 g), and birth weight > 3,500 g (B: 203 g; 95% CI: 67–338 g) were associated with blood loss during planned CS. Considering a patient's clinical characteristic may help predict bleeding in planned CSs and help improve patient safety.

**Competing interests:** The authors have declared that no competing interests exist.

**Abbreviations:** AMA, Advanced maternal age; ART, Assisted reproductive technology; BMI, Body mass index; CI, Confidence interval; CS, Cesarean section; HDP, Hypertensive disorders of pregnancy; IRB, Institutional Review Board; JECS, Japan Environment and Children's Study; PPH, Postpartum hemorrhage; REBOA, Resuscitative endovascular balloon occlusion of the aorta.

## Introduction

Planned cesarean section (CS) is a common obstetric intervention in which postpartum hemorrhage (PPH) is a well-known and life-threatening complication. Massive PPH is the most common cause of maternal death worldwide [1, 2], with life-threatening, massive PPH occurring in one out of every 300 cases [3]. PPH not only affects the immediate maternal prognosis but is also known to increase the risk of postpartum depression, and negatively impact breastfeeding through the development of anemia [4]. Therefore, reducing intraoperative bleeding is of significant importance.

Classically, PPH has been defined as blood loss > 500 g in vaginal delivery and > 1000 g in cesarean delivery [5, 6]. Recent studies have shown that the rate of cesarean deliveries has increased worldwide [7]. According to data published by the largest cohort study performed in Japan in 2014, 20.6% of all live births involved CSs [8]. The study also showed that the rate of CS increased with maternal age (15.2% among those aged 20–29 years and 34.7% among those aged > 40 years) [8]. In Japan, between 1990 and 2015, the proportion of pregnant women with advanced maternal age (AMA) increased from 7.7% to 29.0% [9]. These trends, which have also been observed in other developed countries, may reflect progress in the perinatal management of maternal complications such as uterine myoma and advances in assisted reproductive technology (ART) [9, 10]; therefore, CS rates will likely continue to increase. As the prevalence of CS increases, obstetric care providers will need to identify factors affecting PPH risk, as well as take recent changes in societal characteristics such as increasing maternal age and proportion of ART pregnancies into consideration, to provide optimal clinical management to patients. For those at high risk of PPH, careful diagnostic and intraoperative management strategies before CS can reduce the risk of morbidity.

Although many studies have analyzed risk factors for bleeding during CS [11–15], they failed to differentiate between scheduled and emergency CSs. Notably, emergency CSs, in contrast to elective ones, are frequently associated with obstetric complications such as placental abruption and labor arrest, which could potentially affect the factors contributing to PPH [16, 17]. Therefore, it is important to assess the PPH risks in cesarean sections by distinguishing between elective and emergency procedures, to estimate the risk of PPH more accurately. This study aimed to identify risk factors for PPH in planned CSs performed in Japan, with the goal of improving diagnostic and intraoperative management strategies to reduce morbidity risk associated with PPH.

## Methods

### Patients

This multicenter retrospective cohort study was conducted in two tertiary maternal-fetal medicine units in Fukushima Prefecture, Japan [16]. The study population consisted of pregnant women who delivered at either of these two units between January 1, 2013, and December 31, 2020. Vaginal deliveries, multiparous cases, and cases with insufficient data were excluded. The patients undergoing emergency CS were excluded. In our institution, planned CS were performed for cases with placenta previa, a previous history of cesarean section, or breech presentation. In this study, cases of placenta previa were excluded from the analysis, as it is already a well-known risk factor for PPH [17].

### Statement of ethics

This study was approved by the Institutional Review Board (IRB) of Ohta Nishinouchi Hospital (No. 37). The requirement for informed consent was waived by the IRB of Ohta

Nishinouchi Hospital (No. 37) due to the retrospective nature of the study and the use of anonymized data. All procedures were performed in accordance with the ethical standards of our institutional and/or national research committee and the 1964 Helsinki Declaration and its later amendments or comparable ethical standards.

### Maternal and neonatal information

Maternal and neonatal data were extracted from the medical records of the included women who visited each medical unit. The data accessed for this research were collected between January and February 2023. The following maternal data were collected and used as covariate variables: AMA, prior births, method of conception, maternal body mass index (BMI), placenta previa, uterine myoma, and gestational age. AMA at delivery was defined as a maternal age  $\geq 30$  years, a value that was based on a previous Japanese epidemiological study [9]. Participants were categorized as primiparas or multiparas based on their history of delivery. The method of conception was dichotomized as the presence or absence of ART use, where ART pregnancy was defined as conception after *in vitro* fertilization and intracytoplasmic sperm injection or cryopreservation and frozen or blastocyst embryo transfers [18–20]. Maternal BMI was calculated according to World Health Organization standards (body weight [kg] / height<sup>2</sup> [m<sup>2</sup>], kg/m<sup>2</sup>). Participants were categorized into the following six groups (G), according to pre-pregnancy BMI: G1,  $< 18.5$  kg/m<sup>2</sup>; G2, 18.5 to  $< 20.0$  kg/m<sup>2</sup>; G3, 20.0 to  $< 23.0$  kg/m<sup>2</sup>; G4, 23.0 to  $< 25.0$  kg/m<sup>2</sup>; G5 (25.0 to  $< 30.0$  kg/m<sup>2</sup>), and G6 ( $\geq 30.0$  kg/m<sup>2</sup>) [16, 21–23]. In the study setting, cervical length was routinely measured between 28 and 30 weeks of gestation, with placenta previa defined when the placenta completely covered the internal os of the cervix. In contrast, the placental position was defined as normal when the placental-cervical distance was  $> 2$  cm [24]. Uterine myoma was confirmed if any myoma was present at the time of CS. Gestational age was determined during the early stages of pregnancy based on the mother's last menstrual period and/or ultrasound findings.

Birth weight was measured by a midwife immediately after delivery. Patients were categorized into four groups based on infant birth weight, as follows:  $< 2500$  g; 2500–2999 g; 3000–3499 g, and  $> 3500$  g. In this study, hypertensive disorders of pregnancy (HDP) were defined as chronic maternal or new-onset hypertension after 20 weeks of gestation [25]. Estimated blood loss was also defined based on the contents of the suction jar in the operating room and the weight of surgical pads. PPH was defined as an estimated blood loss of  $> 1000$  g [5] and an additional subcategory was defined for cases in which the blood loss was  $> 1500$  g. For the present analysis, we assumed that one gram of blood was equivalent to one milliliter. In this study, we included factors that had previously been associated with obstetric bleeding as well as variables identified in our data set as confounding factors [9, 19, 26].

### Statistical analysis

No statistical sample size calculation was conducted because of its retrospective nature. Data of women who underwent CS were reviewed. Patients were categorized into two groups, as follows: those with PPH  $> 1000$  g, and those without PPH. Maternal medical backgrounds and obstetric outcomes of groups were compared. The chi-square test was used to compare categorical variables and the t-test was used to compare continuous variables after confirming that each continuous variable was normally distributed. To evaluate the risk factors for PPH ( $> 1000$  g and  $> 1500$  g), multivariate logistic regression analysis was conducted, which included the following variables: maternal age (AMA or not), parity (primipara or multipara), ART pregnancy, pre-pregnancy BMI (G1 to G6), uterine myoma, gestational age at delivery (weeks), birth weight (four categories), and HDP. Both univariate and multivariate linear

analyses were conducted using the same confounders, with the amount of estimated blood loss during CS as a continuous variable outcome. In the linear regression analysis, the results were presented as B: Partial regression coefficients and 95% confidence intervals (CI). Dummy variables were used for categorical variables that consisted of more than three categories. In the multiple regression analysis, the variance inflation factor (VIF) was calculated for each independent variable, and any variable with a VIF above 5 was excluded from the subsequent analysis. SPSS version 26 (IBM Corp., Armonk, NY, USA) was used to perform all statistical analyses. The level of statistical significance was set at  $p < 0.05$ .

## Results

A flow chart depicting the process of participant selection is shown in Fig 1. Throughout the study period, 4866 and 2505 patients were treated at Nishinouchi and Iwase Hospitals, respectively. Sixty-four cases of placenta previa were excluded. After applying the inclusion criteria, 1,069 cases of planned CSs were included in the study. No patient required cesarean hysterectomy.

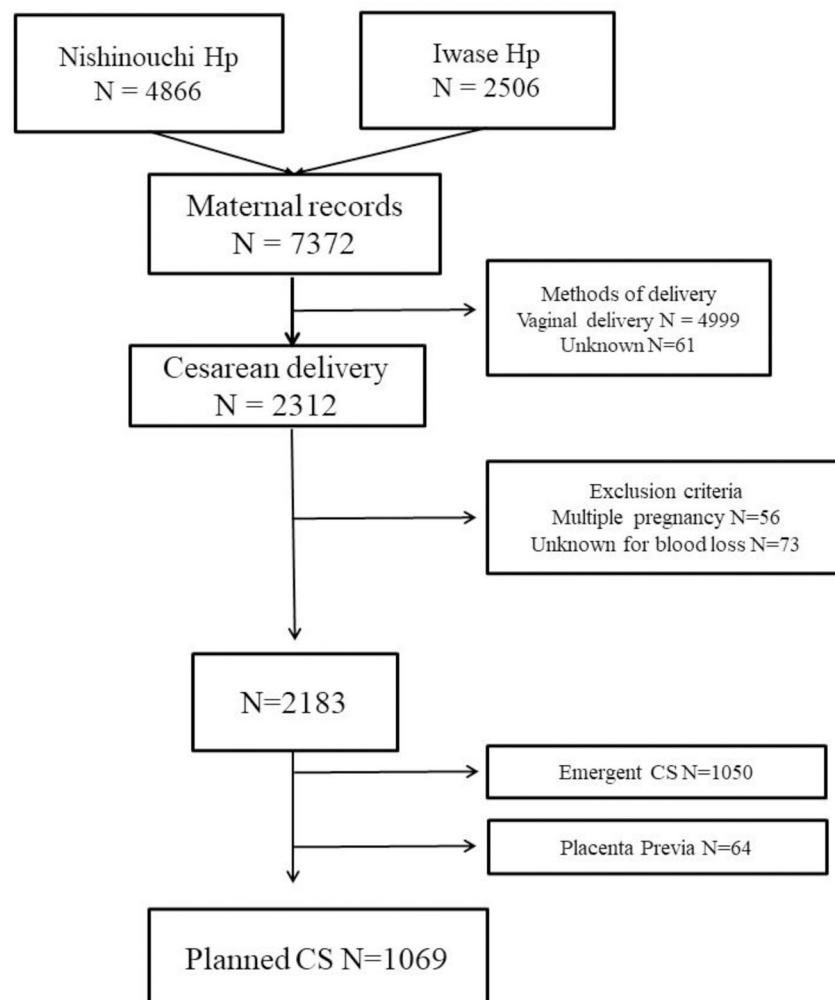

**Fig 1.** Study flow.

<https://doi.org/10.1371/journal.pone.0306488.g001>

**Table 1. Basic characteristics of participants with and without PPH.**

| Variable                         | PPH (+)<br>N = 193 | PPH (-)<br>N = 876 | p-value              |
|----------------------------------|--------------------|--------------------|----------------------|
| Maternal age, mean years (SD)    | 33.7 (4.6)         | 32.4 (5.0)         | < 0.001 <sup>a</sup> |
| Advanced maternal age, %         | 81.7               | 71.3               | 0.003 <sup>b</sup>   |
| Primiparous, %                   | 29.0               | 21.2               | 0.019 <sup>b</sup>   |
| ART pregnancy, %                 | 6.2                | 3.5                | 0.086 <sup>b</sup>   |
| Maternal smoking, %              | 7.8                | 7.7                | 0.942 <sup>b</sup>   |
| BMI, kg/m <sup>2</sup> , %       |                    |                    |                      |
| < 18.5                           | 9.3                | 10.8               | 0.006 <sup>b</sup>   |
| 18.5–19.9                        | 15.9               | 17.5               |                      |
| 20.0–22.9                        | 28.0               | 36.4               |                      |
| 23.0–24.9                        | 11.0               | 12.5               |                      |
| 25.0–29.9                        | 24.2               | 13.1               |                      |
| ≥ 30.0                           | 11.5               | 9.6                |                      |
| Uterine myoma, % (n)             | 14.0               | 4.7                | < 0.001 <sup>b</sup> |
| Obstetrics outcome               |                    |                    |                      |
| Gestational age, mean weeks (SD) | 37.6 (0.8)         | 37.3 (1.7)         | 0.018 <sup>a</sup>   |
| Birth weight, mean g (SD)        | 2973 (393)         | 2744 (471)         | < 0.001 <sup>a</sup> |
| Birth weight, g, %               |                    |                    |                      |
| < 2500                           | 8.3                | 22.3               | < 0.001 <sup>b</sup> |
| 2500–2999                        | 47.2               | 50.5               |                      |
| 3000–3499                        | 36.8               | 24.2               |                      |
| ≥ 3500                           | 7.8                | 3.1                |                      |
| HDP, % (n)                       | 4.1                | 6.5                | 0.214 <sup>b</sup>   |

SD, standard deviation; PPH, postpartum hemorrhage; ART, assisted reproductive technology; BMI, body mass index; HDP, hypertensive disorders of pregnancy

<sup>a</sup> p-value from t-test

<sup>b</sup> p-value from the chi-square test

p < 0.05 is statistically significant

<https://doi.org/10.1371/journal.pone.0306488.t001>

Maternal histories and obstetric outcomes of patients with and without PPH are reported in Table 1. Among all planned CSs, 18.1% (193/1069) of the cases involved PPH. Regarding maternal background, when cases with and without PPH were compared, a significant difference was observed in terms of AMA proportion (81.7 vs. 71.3, p < 0.001), and the presence of uterine myoma (14.0% vs. 4.7%, p < 0.001). Regarding obstetric outcomes, the mean infant birth weight was significantly higher in patients with PPH than in those without (2,973 g vs. 2744 g, p < 0.001).

Table 2 shows risk factors for PPH of > 1000 g and of > 1500 g. Maternal age more than 30, pre-pregnancy BMI of 25.0–29.9 kg/m<sup>2</sup>, and uterine myoma increased the risk of PPH > 1000 g (adjusted odds ratio [aOR]: 1.66, 95% confidence interval [CI]: 1.08–2.57; aOR: 2.42, 95% CI: 1.49–3.96; and aOR: 2.71, 95% CI: 1.51–4.85; respectively). Maternal smoking, pre-pregnancy BMI of 25.0–29.9 kg/m<sup>2</sup>, and uterine myoma increased the risk of PPH > 1500 g (aOR: 3.09, 95% CI: 1.16–8.20; aOR: 2.80, 95% CI: 1.08–7.23; and aOR: 4.62, 95% CI: 1.89–11.3; respectively).

Factors related to estimated blood loss, treated as a continuous variable outcome in planned CSs, were calculated via univariate and multivariate linear analyses and are presented in Table 3. Multivariate linear analysis revealed that AMA (B: 83 g; 95% CI: 27–139 g), ART

Table 2. Risk factors for PPH &gt; 1000 g, and 1500 g.

| Variable               | PPH > 1000g |                     |              | PPH > 1500g |                     |              | PPH > 2000g |                |         |
|------------------------|-------------|---------------------|--------------|-------------|---------------------|--------------|-------------|----------------|---------|
|                        | aOR         | 95% CI              | P value      | aOR         | 95% CI              | P value      | aOR         | 95% CI         | P value |
| Advanced maternal age  | 1.74        | 1.14 to 2.65        | 0.01         | 1.89        | 0.83 to 4.30        | 0.13         | 1.89        | 0.35 to 10.1   | 0.46    |
| Multipara              | 0.73        | 0.49 to 1.09        | 0.12         | 0.93        | 0.45 to 1.92        | 0.852        | 1.14        | 0.27 to 4.85   | 0.86    |
| ART pregnancy          | 2.34        | 1.17 to 4.67        | 0.016        | 2.83        | 1.03 to 7.82        | 0.044        | 10.4        | 1.78 to 60.7   | 0.009   |
| Maternal smoking       | 1.44        | 0.78 to 2.67        | 0.244        | <b>2.63</b> | <b>0.99 to 7.03</b> | <b>0.053</b> | 11.6        | 2.85 to 46.9   | 0.001   |
| BMI, kg/m <sup>2</sup> |             |                     |              |             |                     |              |             |                |         |
| <18.5-                 | 0.92        | 0.53 to 1.77        | 0.971        | 0.32        | 0.07 to 1.49        | 0.146        | 2.95        | 0.22 to 39.3   | 0.414   |
| 18.5–19.9              | 1.16        | 0.71 to 1.90        | 0.923        | 1.89        | 0.83 to 4.30        | 0.128        | 7.69        | 1.06 to 55.9   | 0.044   |
| 20.0–22.9              | Ref         | -                   | -            | Ref         | -                   | -            | Ref         | -              | -       |
| 23.0–24.9              | 1.12        | 0.64 to 1.95        | 0.687        | 1.33        | 0.50 to 3.54        | 0.573        | 14.8        | 2.05 to 107.2  | 0.008   |
| 25.0–29.9              | <b>2.27</b> | <b>1.41 to 3.66</b> | <b>0.001</b> | <b>2.47</b> | <b>1.08 to 5.68</b> | <b>0.033</b> | 13.1        | 1.65 to 1003.9 | 0.015   |
| ≥30                    | 1.06        | 0.57 to 1.97        | 0.857        | 1.1         | 0.35 to 3.45        | 0.87         | 8.13        | 0.83 to 80.0   | 0.073   |
| <b>Uterine myoma</b>   | <b>2.71</b> | <b>1.51 to 4.85</b> | <b>0.001</b> | 5.33        | 2.20 to 12.9        | <0.001       | NA          | -              | 0.997   |
| Placenta previa        | 8.79        | 4.71 to 16.4        | <0.001       | 18.8        | 8.19 to 43.3        | <0.001       | 33.8        | 8.58 to 133.5  | <0.001  |
| Gestational age, week  | 0.95        | 0.82 to 1.10        | 0.506        | 0.79        | 0.62 to 1.02        | 0.069        | 0.57        | 0.32 to 1.03   | 0.064   |
| Birth weight           |             |                     |              |             |                     |              |             |                |         |
| <2500                  | 0.24        | 0.13 to 0.45        | <0.001       | 0.12        | 0.03 to 0.43        | 0.001        | 0.02        | 0.00 to 3.26   | 0.13    |
| 2500–2999              | 0.56        | 0.38 to 0.81        | 0.002        | 0.39        | 0.20 to 0.76        | 0.006        | 1.49        | 0.35 to 6.31   | 0.592   |
| 3000–3499              | Ref         | -                   | -            | Ref         | -                   | -            | Ref         | -              | -       |
| ≥3500                  | 1.54        | 0.72 to 3.30        | 0.267        | 2.23        | 0.74 to 6.74        | 0.156        | 7.21        | 0.88 to 59.0   | 0.066   |
| HDP                    | 0.65        | 0.29 to 1.46        | 0.292        | 0.16        | 0.02 to 1.72        | 0.132        | 0.45        | 0.02 to 10.7   | 0.622   |

PPH: postpartum hemorrhage; aOR: adjusted odds ratio; CI: confidential interval; ART: assisted reproductive technology; BMI: body mass index; HDP: hypertensive disorders of pregnancy; Ref: reference; NA: not available

<https://doi.org/10.1371/journal.pone.0306488.t002>

pregnancy (B: 239 g; 95% CI: 121–357 g), maternal smoking (B: 107 g; 95% CI: 13–200 g), pre-pregnancy BMI of 25.0 to <29.9 kg/m<sup>2</sup> (B: 74 g; 95% CI: 22–167 g), uterine myoma (B: 151 g; 95% CI: 47–256 g), and birth weight > 3500 g (B: 203 g; 95% CI: 67–3338 g) were associated with increases in the estimated blood loss during planned CS.

## Discussion

Our study identified several established risk factors for PPH among women undergoing planned CS, including AMA, uterine myoma, maternal smoking, and high maternal BMI. Importantly, although ART was not a risk factor for PPH, defined either as blood loss >1000 g or >1500 g, in multiple logistic regression analysis, multiple linear regression analysis indicated that an ART pregnancy was the factor that affected blood loss the most during planned CS, followed by birth weight > 3,500 g, uterine myoma, maternal smoking, maternal age > 30 years, and maternal pre-pregnancy BMI of 25.0 to < 30.0 kg/m<sup>2</sup>. These findings suggest that obstetric care providers should consider the potential risk associated with ART pregnancy when assessing risk of PPH in women undergoing planned CS.

Our findings suggest that smoking during pregnancy is a significant risk factor for PPH development. The underlying mechanism linking smoking during pregnancy to abnormal bleeding remains unclear. One possibility is that systemic inflammation induced by air pollutants [27, 28] may impact the uterine endometrium, leading to poor decidualization [29]. Animal studies have shown that exposure to fine particulate matter (PM<sub>2.5</sub>) during pregnancy can lead to placental inflammation [30]. Thus, it is reasonable to assume that pollutant-induced

**Table 3. Factors related to estimate blood loss during planned cesarean section determined via univariate and multivariate linear regression analyses.**

| Variable               | Univariate linear regression analysis |              |         | Multiple linear regression analysis <sup>1</sup> |              |         |
|------------------------|---------------------------------------|--------------|---------|--------------------------------------------------|--------------|---------|
|                        | B (g)                                 | 95% CI       | p-value | B (g)                                            | 95% CI       | p-value |
| Advanced maternal age  | 94                                    | 43 to 145    | <0.001  | 83                                               | 27 to 139    | 0.004   |
| Multipara              | -57                                   | -111 to -4   | 0.036   | -49                                              | -109 to 10   | 0.104   |
| ART pregnancy          | 78                                    | -37 to 194   | 0.183   | 239                                              | 121 to 357   | <0.001  |
| Maternal smoking       | 65                                    | -19 to 150   | 0.127   | 107                                              | 13 to 200    | 0.026   |
| BMI, kg/m <sup>2</sup> |                                       |              |         |                                                  |              |         |
| < 18.5-                | -32                                   | -105 to 46   | 0.421   | -0.1                                             | -84 to 84    | 1.000   |
| 18.5–19.9              | -16                                   | -79 to 47    | 0.615   | 26                                               | -45 to 97    | 0.473   |
| 20.0–22.9              | Ref                                   | -            | -       | Ref                                              | -            | -       |
| 23.0–24.9              | 19                                    | -54 to 92    | 0.614   | 58                                               | -24 to 139   | 0.164   |
| 25.0–29.9              | 79                                    | 13 to 146    | 0.019   | 74                                               | 22 to 167    | 0.011   |
| ≥ 30                   | 49                                    | -31 to 128   | 0.231   | 11                                               | -81 to 102   | 0.815   |
| Uterine myoma          | 266                                   | 174 to 357   | <0.001  | 151                                              | 47 to 256    | 0.005   |
| Gestational age, week  | 26                                    | 12 to 41     | <0.001  | -21                                              | -40 to -3    | 0.026   |
| Birth weight           |                                       |              |         |                                                  |              |         |
| < 2500                 | -178                                  | -238 to -122 | < 0.001 | -244                                             | -324 to -164 | <0.001  |
| 2500–2999              | -23                                   | -69 to 22    | 0.312   | -95                                              | -156 to -36  | 0.002   |
| 3000–3499              | Ref                                   | -            | -       | Ref                                              | -            | -       |
| ≥ 3500                 | 251                                   | 135 to 367   | <0.001  | 203                                              | 67 to 338    | 0.004   |
| HDP                    | -135                                  | -229 to -40  | 0.005   | -145                                             | -254 to -37  | 0.009   |

PPH, postpartum hemorrhage; B, partial regression coefficient; aOR, adjusted odds ratio; CI, confidence interval; ART, assisted reproductive technology; BMI, body mass index; HDP, hypertensive disorder of pregnancy.

<sup>1</sup>The R-squared value in the linear regression analysis was 0.12

<https://doi.org/10.1371/journal.pone.0306488.t003>

inflammation during pregnancy could result in inflammation of the endometrium [31], leading to placental adhesion to the uterus. Consequently, maternal smoking may increase the risk of blood loss during CS due to abnormal placentation of the uterus [19].

The relationship between ART pregnancy and PPH can be attributed to abnormal placentation, as proposed by Esh et al. [32]. The pathogenesis of PPH due to ART may rely on mechanical factors such as primary deficiency in the decidua caused by local trauma to the uterine wall or biological factors such as an abnormal maternal response to trophoblast invasion. Abnormal placentation in ART pregnancies may result in the impaired development of spiral arteries, leading to placental adhesion to the uterus and subsequent PPH [19]. While few studies have examined the associations between ART treatment and maternal PPH risk, those that have all indicate that women who underwent ART are at higher risk of PPH [33–36]. However, our study is the first to focus solely on planned cesarean sections. Furthermore, ART is strongly associated with placenta previa, a well-known PPH risk factor [35]. By excluding cases of placenta previa, the present study demonstrates that there is also a direct relationship between ART pregnancies and PPH during planned CS, which is independent of the presence of placenta previa.

In recent years, developed countries have seen an increase in maternal age, which is associated with a heightened risk of obstetric complications [9]. This increase in maternal age suggests a rising demand for ART pregnancies [36]. Our results indicate the need to pay attention to the enhanced risks and provide specialized management approaches in cases of ART pregnancies, particularly in light of their escalating prevalence. This investigation offers essential insight for healthcare provider, providing them with the knowledge to foresee and mitigate the

distinct risks inherent to ART more effectively. Consequently, the results presented here have the potential to significantly enhance maternal health outcomes in developed countries.

The prevention of PPH by minimizing its risk factors is a major clinical challenge. There has been increasing interest in the influence of preconception care on obstetric outcomes, including lifestyle modifications such as improving nutrition and smoking cessation [25, 37, 38]. Modifiable factors such as high maternal BMI and smoking status are significant risk factors for PPH. Therefore, preconception care focusing on improving daily maternal nutrition and smoking cessation are potential preventive strategies that may allow for the reduction of morbidity risk associated with PPH. It is important to emphasize the potential benefits of preconception care based on these factors due to their modifiable nature and potential for improving maternal and fetal outcomes. Promoting healthy preconception habits and emphasizing the importance of preconception care will likely improve maternal and fetal outcomes.

In the present study, unmodifiable risk factors for PPH including ART pregnancy, uterine myoma, and maternal age were found to contribute to massive PPH during planned CS. Although preventive strategies taken during preconception care will likely fail to minimize risk due to these factors, use of minimally invasive intraoperative management strategies such as resuscitative endovascular balloon occlusion of the aorta (REBOA) may provide a solution. REBOA has been shown to reduce overall blood loss and transfusions, improving maternal outcomes in patients with expected placenta accreta spectrum disorders [39–43]. Our institution recently introduced REBOA for high-risk PPH cases [44]. We consider that the use of REBOA may help prevent PPH when bleeding risk factors identified in our analysis coincide with placenta previa, a known bleeding factor. We are currently conducting a multi-institutional clinical study to determine whether the use of REBOA can reduce the risk of PPH in women with placenta previa who present with risk factors identified in this analysis.

A primary strength of the current study is that patient data were derived from two tertiary care fetal medicine units in which all patients were managed by obstetricians with equivalent training for obstetric emergencies [16]. Nonetheless, this study has potential limitations. First, the retrospective nature of the study may have allowed for the introduction of bias, and errors in data collection and analysis. Second, planned CS were performed for cases with a history of previous CSs and breech presentation. However, we did not stratify the cases by their specific indications for CS. Further analysis is required on how preoperative preparations vary according to different indications for planned CS.

In conclusion, this study aimed to predict risk of bleeding during planned CS by considering factors related to a patient's social background such as maternal age and ART pregnancy. Our findings suggest that evidence-based practices that consider the social backgrounds of patients may improve patient safety during planned CS.

## Supporting information

**S1 Data.**  
(TXT)

## Author Contributions

**Conceptualization:** Tomoko Yamaguchi, Hyo Kyojuka, Tsuyoshi Murata, Fumihito Ito, Toma Fukuda, Yasuhisa Nomura.

**Data curation:** Tomoko Yamaguchi, Hyo Kyojuka, Momoka Ito, Tsuyoshi Hiraiwa, Tsuyoshi Murata, Misa Sugeno, Fumihito Ito, Daisuke Suzuki, Toma Fukuda.

**Formal analysis:** Hyo Kyojuka.



**Investigation:** Tomoko Yamaguchi, Hyo Kyojuka.

**Methodology:** Tomoko Yamaguchi, Momoka Ito, Tsuyoshi Murata, Daisuke Suzuki.

**Project administration:** Tomoko Yamaguchi, Tsuyoshi Murata, Daisuke Suzuki.

**Validation:** Shun Yasuda.

**Writing – original draft:** Hyo Kyojuka.

**Writing – review & editing:** Tomoko Yamaguchi, Shun Yasuda, Fujimori Keiya, Yasuhisa Nomura.

## References

1. Thurn L, Wikman A, Westgren M, Lindqvist PG. Massive blood transfusion in relation to delivery: incidence, trends and risk factors: a population-based cohort study. *BJOG*. 2019; 126: 1577–1586. <https://doi.org/10.1111/1471-0528.15927> PMID: 31483935
2. Khan KS, Wojdyla D, Say L, Gülmezoglu AM, Van Look PF. WHO analysis of causes of maternal death: a systematic review. *Lancet*. 2006; 367: 1066–1074. [https://doi.org/10.1016/S0140-6736\(06\)68397-9](https://doi.org/10.1016/S0140-6736(06)68397-9) PMID: 16581405
3. Kramer MS, Berg C, Abenheim H, Dahhou M, Rouleau J, Mehrabadi A, et al. Incidence, risk factors, and temporal trends in severe postpartum hemorrhage. *Am J Obstet Gynecol*. 2013; 209: 449.e441–447. <https://doi.org/10.1016/j.ajog.2013.07.007> PMID: 23871950
4. Maeda Y, Ogawa K, Morisaki N, Tachibana Y, Horikawa R, Sago H. Association between perinatal anemia and postpartum depression: A prospective cohort study of Japanese women. *Int J Gynaecol Obstet*. 2020; 148: 48–52. <https://doi.org/10.1002/ijgo.12982> PMID: 31556455
5. Oyelese Y, Ananth CV. Postpartum hemorrhage: epidemiology, risk factors, and causes. *Clin Obstet Gynecol*. 2010; 53: 147–156. <https://doi.org/10.1097/GRF.0b013e3181cc406d> PMID: 20142652
6. Rath WH. Postpartum hemorrhage—update on problems of definitions and diagnosis. *Acta Obstet Gynecol Scand*. 2011; 90: 421–428. <https://doi.org/10.1111/j.1600-0412.2011.01107.x> PMID: 21332452
7. Parant O, Guerby P, Bayoumeu F. [Obstetric and anesthetic specificities in the management of a postpartum hemorrhage (PPH) associated with cesarean section]. *J Gynecol Obstet Biol Reprod. (Paris)* 2014; 43: 1104–1122. <https://doi.org/10.1016/j.jgyn.2014.10.004> PMID: 25447395
8. Kyojuka H, Fujimori K, Hosoya M, Yasumura S, Yokoyama T, Sato A, et al. The Japan Environment and Children's Study (JECS) in Fukushima prefecture: pregnancy outcome after the Great East Japan earthquake. *Tohoku J Exp Med*. 2018; 246: 27–33. <https://doi.org/10.1620/tjem.246.27> PMID: 30210086
9. Kyojuka H, Fujimori K, Hosoya M, Yasumura S, Yokoyama T, Sato A, et al. The effect of maternal age at the first childbirth on gestational age and birth weight: the Japan Environment and Children's Study (JECS). *J Epidemiol*. 2019; 29: 187–191. <https://doi.org/10.2188/jea.JE20170283> PMID: 30078812
10. Murata T, Kyojuka H, Endo Y, Fukuda T, Yasuda S, Yamaguchi A, et al. Preterm deliveries in women with uterine myomas: the Japan Environment and Children's Study. *Int J Environ Res Public Health*. 2021; 18: 2246. <https://doi.org/10.3390/ijerph18052246> PMID: 33668326
11. Larsson C, Saltvedt S, Wiklund I, Pahlen S, Andolf E. Estimation of blood loss after cesarean section and vaginal delivery has low validity with a tendency to exaggeration. *Acta Obstet Gynecol Scand*. 2006; 85: 1448–1452. <https://doi.org/10.1080/00016340600985032> PMID: 17260220
12. Duthie SJ, Ghosh A, Ng A, Ho PC. Intra-operative blood loss during elective lower segment caesarean section. *Br J Obstet Gynaecol*. 1992; 99: 364–367. <https://doi.org/10.1111/j.1471-0528.1992.tb13749.x> PMID: 1622905
13. Al-Zirqi I, Vangen S, Forsen L, Stray-Pedersen B. Prevalence and risk factors of severe obstetric haemorrhage. *BJOG*. 2008; 115: 1265–1272. <https://doi.org/10.1111/j.1471-0528.2008.01859.x> PMID: 18715412
14. Bergholt T, Stenderup JK, Vedsted-Jakobsen A, Helm P, Lenstrup C. Intraoperative surgical complication during cesarean section: an observational study of the incidence and risk factors. *Acta Obstet Gynecol Scand*. 2003; 82: 251–256. <https://doi.org/10.1034/j.1600-0412.2003.00095.x> PMID: 12694122

15. Combs CA, Murphy EL, Laros RK Jr. Factors associated with hemorrhage in cesarean deliveries. *Obstet Gynecol.* 1991; 77: 77–82. PMID: [1984231](#)
16. Kyojuzuka H, Hiraiwa T, Murata T, Sugeno M, Jin T, Ito F, et al. Gestational weight gain as a risk factor for dystocia during first delivery: a multicenter retrospective cohort study in Japan. *BMC Pregnancy Childbirth.* 2022; 22: 728. <https://doi.org/10.1186/s12884-022-05055-6> PMID: [36151536](#)
17. Kyojuzuka H, Murata T, Fukusda T, Yamaguchi A, Kanno A, Yasuda S, et al. Teenage pregnancy as a risk factor for placental abruption: Findings from the prospective Japan environment and children's study. *PLoS One.* 2021; 16: e0251428. <https://doi.org/10.1371/journal.pone.0251428> PMID: [33984034](#)
18. Kyojuzuka H, Nishigori H, Murata T, Fukuda T, Yamaguchi A, Kanno A, et al. Prepregnancy antiinflammatory diet in pregnant women with endometriosis: The Japan Environment and Children's Study. *Nutrition.* 2021; 85: 111129. <https://doi.org/10.1016/j.nut.2020.111129> PMID: [33545538](#)
19. Kyojuzuka H, Yamaguchi A, Suzuki D, Fujimori K, Hosoya M, Yasumura S, et al. Risk factors for placenta accreta spectrum: findings from the Japan environment and Children's study. *BMC Pregnancy Childbirth.* 2019; 19: 447. <https://doi.org/10.1186/s12884-019-2608-9> PMID: [31775687](#)
20. Kyojuzuka H, Murata T, Fukuda T, Imaizumi K, Yamaguchi A, Yasuda S, et al. Preconception vitamin D intake and obstetric outcomes in women using assisted reproductive technology: the Japan Environment and Children's Study. *BMC Pregnancy Childbirth.* 2022; 22: 542. <https://doi.org/10.1186/s12884-022-04861-2> PMID: [35790896](#)
21. Yamaguchi A, Kyojuzuka H, Kanno A, Murata T, Fukuda T, Yasuda S, et al. Gestational weight gain and risk factors for postpartum depression symptoms from the Japan Environment and Children's Study: a prospective cohort study. *J Affect Disord.* 2021; 283: 223–228. <https://doi.org/10.1016/j.jad.2021.01.080> PMID: [33561803](#)
22. Jin T, Kyojuzuka H, Fukuda T, Fujimori M, Murata T, Nomura S, et al. Effect of gestational weight gain on placental weight: A single tertiary referral center study of Japanese women. *J Obstet Gynaecol Res.* 2021; 47: 4241–4249. <https://doi.org/10.1111/jog.15058> PMID: [34655145](#)
23. Kyojuzuka H, Jin T, Fujimori M, Nomura S, Suzuki D, Fukuda T, et al. Effect of gestational weight gain on preeclampsia among underweight women: A single tertiary referral center study in Japanese women. *J Obstet Gynaecol Res.* 2022; 48: 1141–1148. <https://doi.org/10.1111/jog.15200> PMID: [35246898](#)
24. Kyojuzuka H, Jin T, Fujimori M, Matsuno M, Nomura S, Suzuki D, et al. Association of placenta previa with placental size in Japanese women: A study from a single tertiary referral center. *J Obstet Gynaecol Res.* 2022; 48: 379–384. <https://doi.org/10.1111/jog.15113> PMID: [34856649](#)
25. Sugeno M, Kyojuzuka H, Murata T, Hiraiwa T, Jin T, Fujimori M, et al. Optimal gestational weight gain to reduce the risk of hypertension disorders of pregnancy among women with obesity: A single tertiary referral center study in Japan. *J Obstet Gynaecol Res.* 2022; 48: 2766–2773. <https://doi.org/10.1111/jog.15372> PMID: [35894514](#)
26. Neary C, Naheed S, McLernon DJ, Black M. Predicting risk of postpartum haemorrhage: a systematic review. *BJOG.* 2021; 128: 46–53. <https://doi.org/10.1111/1471-0528.16379> PMID: [32575159](#)
27. Lee PC, Talbott EO, Roberts JM, Catov JM, Sharma RK, Ritz B. Particulate air pollution exposure and C-reactive protein during early pregnancy. *Epidemiology.* 2011; 22: 524–531. <https://doi.org/10.1097/EDE.0b013e31821c6c58> PMID: [21516040](#)
28. van den Hooven EH, de Kluizenaar Y, Pierik FH, Hofman A, van Ratingen SW, Zandveld PY, et al. Chronic air pollution exposure during pregnancy and maternal and fetal C-reactive protein levels: the Generation R Study. *Environ Health Perspect.* 2012; 120: 746–751. <https://doi.org/10.1289/ehp.1104345> PMID: [22306530](#)
29. Khong TY. The pathology of placenta accreta, a worldwide epidemic. *J Clin Pathol.* 2008; 61:1243–1246. <https://doi.org/10.1136/jcp.2008.055202> PMID: [18641410](#)
30. de Melo JO, Soto SF, Katayama IA, Wenceslau CF, Pires AG, Veras MM, et al. Inhalation of fine particulate matter during pregnancy increased IL-4 cytokine levels in the fetal portion of the placenta. *Toxicol Lett.* 2015; 232: 475–480. <https://doi.org/10.1016/j.toxlet.2014.12.001> PMID: [25481569](#)
31. Michikawa T, Morokuma S, Yamazaki S, Fukushima K, Kato K, Nitta H. Exposure to air pollutants during the early weeks of pregnancy, and placenta praevia and placenta accreta in the western part of Japan. *Environ Int.* 2016;92–93: 464–470. <https://doi.org/10.1016/j.envint.2016.04.037> PMID: [27164555](#)
32. Esh-Broder E, Ariel I, Abas-Bashir N, Bdolah Y, Celnikier DH. Placenta accreta is associated with IVF pregnancies: a retrospective chart review. *BJOG.* 2011; 118: 1084–1089. <https://doi.org/10.1111/j.1471-0528.2011.02976.x> PMID: [21585640](#)
33. Lei LL, Lan YL, Wang SY, Feng W, Zhai ZJ. Perinatal complications and live-birth outcomes following assisted reproductive technology: a retrospective cohort study. *Chin Med J (Engl).* 2019; 132: 2408–2416. <https://doi.org/10.1097/CM9.0000000000000484> PMID: [31634242](#)

34. Nyfløt LT, Sandven I, Oldereid NB, Stray-Pedersen B, Vangen S. Assisted reproductive technology and severe postpartum haemorrhage: a case-control study. *BJOG*. 2017; 124: 1198–1205. <https://doi.org/10.1111/1471-0528.14471> PMID: 27981745
35. Healy DL, Breheny S, Halliday J, Jaques A, Rushford D, Garrett C, et al. Prevalence and risk factors for obstetric haemorrhage in 6730 singleton births after assisted reproductive technology in Victoria Australia. *Hum Reprod*. 2010; 25: 265–74. <https://doi.org/10.1093/humrep/dep376> PMID: 19897853
36. Tang D, Cheng Y, Feng X, Li X, Coyte PC. The use of IVF/ICSI and risk of postpartum hemorrhage: A retrospective cohort study of 153,765 women in China. *Front Public Health*. 2023; 11: 1016457. <https://doi.org/10.3389/fpubh.2023.1016457> PMID: 37026146
37. Kyojuka H, Murata T, Fukuda T, Yamaguchi A, Kanno A, Yasuda S, et al. Association between preconception dietary inflammatory index and neurodevelopment of offspring at 3 years of age: The Japan Environment and Children's Study. *Nutrition*. 2022; 102: 111708. <https://doi.org/10.1016/j.nut.2022.111708> PMID: 35843101
38. Omoto T, Kyojuka H, Murata T, Imaizumi K, Yamaguchi A, Fukuda T, et al. Influence of preconception carbohydrate intake on hypertensive disorders of pregnancy: The Japan Environment and Children's Study. *J Obstet Gynaecol Res*. 2023; 49: 577–586. <https://doi.org/10.1111/jog.15501> PMID: 36411062
39. Manzano-Nunez R, Escobar-Vidarte MF, Naranjo MP, Rodriguez F, Ferrada P, Casallas JD, et al. Expanding the field of acute care surgery: a systematic review of the use of resuscitative endovascular balloon occlusion of the aorta (REBOA) in cases of morbidly adherent placenta. *Eur J Trauma Emerg Surg*. 2018; 44: 519–526. <https://doi.org/10.1007/s00068-017-0840-4> PMID: 28929283
40. Cui S, Zhi Y, Cheng G, Zhang K, Zhang L, Shen L. Retrospective analysis of placenta previa with abnormal placentation with and without prophylactic use of abdominal aorta balloon occlusion. *Int J Gynaecol Obstet*. 2017; 137: 265–270. <https://doi.org/10.1002/ijgo.12132> PMID: 28236650
41. Wu Q, Liu Z, Zhao X, Liu C, Wang Y, Chu Q, et al. Outcome of pregnancies after balloon occlusion of the infrarenal abdominal aorta during caesarean in 230 patients with placenta praevia accreta. *Cardiovasc Intervent Radiol*. 2016; 39: 1573–1579. <https://doi.org/10.1007/s00270-016-1418-y> PMID: 27439624
42. Ordoñez CA, Manzano-Nunez R, Parra MW, Rasmussen TE, Nieto AJ, Herrera-Escobar JP, et al. Prophylactic use of resuscitative endovascular balloon occlusion of the aorta in women with abnormal placentation: A systematic review, meta-analysis, and case series. *J Trauma Acute Care Surg*. 2018; 84: 809–818. <https://doi.org/10.1097/TA.0000000000001821> PMID: 29401189
43. Kyojuka H, Yasuda S, Murata T, Sugeno M, Fukuda T, Yamaguchi A, et al. Prophylactic resuscitative endovascular balloon occlusion of the aorta use during cesarean hysterectomy for placenta accreta spectrum: a retrospective cohort study. *J Matern Fetal Neonatal Med*. 2023; 36:2232073. <https://doi.org/10.1080/14767058.2023.2232073> PMID: 37408127
44. Kyojuka H, Sugeno M, Murata T, Jin T, Ito F, Nomura Y, et al. Introduction and utility of resuscitative endovascular balloon occlusion of the aorta for cases with a potential high risk of postpartum hemorrhage: A single tertiary care center experience of two cases. *Fukushima J Med Sci*. 2022; 68: 117–122. <https://doi.org/10.5387/fms.2022-01> PMID: 35444074
